# Supplementary material for: Sex-Specific Metabolic Pathways Were Associated with Alzheimer’s Disease (AD) Endophenotypes in the European Medical Information Framework for AD Multimodal Biomarker Discovery Cohort
Source: Biomedicines. 2021 Nov 3;9(11):1610. doi: 10.3390/biomedicines9111610 (PMC8615383; doi:10.3390/biomedicines9111610)
Supplement: Supplementary file 1 [file biomedicines-09-01610-s001.zip › Supplementary data.xlsx]

## Sheet: Sheet1
	Metabolites showed interaction with sex in the full cohort and in each sex stratum		Metabolites showed interaction with APOE ε4 in the full cohort and in each APOE ε4 stratum
	Females	Males	APOE ε4 +	APOE ε4 -
	vanillylmandelate..VMA.	phenylacetylcarnitine	kynurenine	phenylacetate
	N6.acetyllysine	N.acetylthreonine	X2.aminoheptanoate	isobutyrylcarnitine..C4.
	indolepropionate	xanthurenate	X1.linoleoyl.2.linolenoyl.GPC..18.2.18.3..	phenylacetylglutamine
	sphingomyelin..d18.2.21.0..d16.2.23.0..	N.acetylneuraminate	propionylcarnitine..C3.	sarcosine
	stachydrine	xylose	glycosyl.N.behenoyl.sphingadienine..d18.2.22.0..	carboxyethyl.GABA
	tryptophan.betaine	X1.linoleoyl.GPC..18.2.	X1.stearoyl.2.docosahexaenoyl.GPE..18.0.22.6..	hypoxanthine
	N.methylproline	X1.stearoyl.GPC..18.0.	X1.linolenoyl.GPC..18.3..	phenylacetylcarnitine
	kynurenate	kynurenate	X1.palmitoyl.2.docosahexaenoyl.GPE..16.0.22.6..	X3.methoxytyrosine
	carotene.diol..2.	hypotaurine	caproate..6.0.	adenine
	carotene.diol..3.	X5..galactosylhydroxy..L.lysine	X1.linoleoyl.GPC..18.2.	X2.aminooctanoate
Diagnosis (AD/CTL)	isovalerylcarnitine..C5.	sphingomyelin..d18.0.20.0..d16.0.22.0..	N.acetylalanine	N.acetylglycine
	methyl.4.hydroxybenzoate.sulfate	methyl.glucopyranoside..alpha...beta.	bilirubin..E.E..	argininate.
	X1.linoleoylglycerol..18.2.	citrulline	butyrylcarnitine..C4.
	tricosanoyl.sphingomyelin..d18.1.23.0..		X3.methylglutarylcarnitine..2.
	carotene.diol..1.		quinolinate
			C.glycosyltryptophan
			X1.palmitoleoyl.2.linolenoyl.GPC..16.1.18.3..
			X1.palmitoyl.2.docosahexaenoyl.GPC..16.0.22.6.
			methyl.glucopyranoside..alpha...beta.
			argininate.
			X4.hydroxyhippurate
			X3beta.7alpha.dihydroxy.5.cholestenoate
			X1.linoleoyl.GPE..18.2..
	gamma.CEHC	kynurenate	X1.stearoyl.2.oleoyl.GPE..18.0.18.1.	X2.hydroxydecanoate
	gamma.glutamylmethionine	gamma.glutamylleucine	X1..1.enyl.stearoyl..2.oleoyl.GPE..P.18.0.18.1.	eicosenoylcarnitine..C20.1..
	X1.arachidonoyl.GPA..20.4.	N6.acetyllysine	X1.stearoyl.2.docosahexaenoyl.GPE..18.0.22.6..	X1.stearoyl.2.linoleoyl.GPE..18.0.18.2..
	maltotriose	urea	X1.palmitoyl.2.docosahexaenoyl.GPE..16.0.22.6..	mannose
	X1.palmitoyl.GPA..16.0.	N.acetylleucine	X2.hydroxydecanoate	X2.aminobutyrate
			X1..1.enyl.palmitoyl..2.linoleoyl.GPE..P.16.0.18.2..	X1.oleoyl.2.linoleoyl.GPE..18.1.18.2..
			X1.methylhistidine	docosadienoate..22.2n6.
			X1..1.enyl.palmitoyl..2.oleoyl.GPE..P.16.0.18.1..	pyroglutamine.
			retinol..Vitamin.A.	galactonate
			phenylacetylglutamine	X1.palmitoyl.2.linoleoyl.GPE..16.0.18.2.
			stearoyl.sphingomyelin..d18.1.18.0.	X1.stearoyl.2.oleoyl.GPI..18.0.18.1..
			sphingomyelin..d18.1.18.1..d18.2.18.0.	gamma.CEHC
			X1.stearoyl.2.linoleoyl.GPE..18.0.18.2..	X2.hydroxybutyrate.2.hydroxyisobutyrate
			X1..1.enyl.stearoyl..2.linoleoyl.GPE..P.18.0.18.2..	X1.linolenoyl.GPC..18.3..
			xylose	arabitol.xylitol
			X1.palmitoyl.2.oleoyl.GPE..16.0.18.1.	X1.myristoyl.2.arachidonoyl.GPC..14.0.20.4..
P-tau			picolinate	X3.methylglutaconate
			homocitrulline	X1.myristoyl.2.palmitoyl.GPC..14.0.16.0.
			serine	X1.lignoceroyl.GPC..24.0.
			X3.methylglutaconate	catechol.sulfate
			X4.guanidinobutanoate	X1.linoleoyl.GPE..18.2..
			X2.aminophenol.sulfate	X2.hydroxynervonate.
			cystathionine	uridine
			X1.stearoyl.2.oleoyl.GPI..18.0.18.1..	X1.2.dilinoleoyl.GPC..18.2.18.2.
			X3.methylhistidine	arachidonate..20.4n6.
				X1.oleoyl.GPE..18.1.
				oleate.vaccenate..18.1.
				p.cresol.sulfate
				N..2.furoyl.glycine
				arabonate.xylonate
				N.formylmethionine
				EDTA
				creatine
				X5.methyluridine..ribothymidine.
	indoleacetate	N6.acetyllysine	X1.methylhistidine	X2.hydroxydecanoate
	gamma.CEHC		X1.palmitoyl.2.docosahexaenoyl.GPE..16.0.22.6..	eicosenoylcarnitine..C20.1..
	laurate..12.0.		X1.stearoyl.2.docosahexaenoyl.GPE..18.0.22.6..	X1.oleoyl.2.linoleoyl.GPE..18.1.18.2..
	X2.keto.3.deoxy.gluconate		kynurenine	X1.stearoyl.2.linoleoyl.GPE..18.0.18.2..
	X1.arachidonoyl.GPA..20.4.		stearoyl.sphingomyelin..d18.1.18.0.	docosadienoate..22.2n6.
	cysteine.glutathione.disulfide		X1..1.enyl.stearoyl..2.oleoyl.GPE..P.18.0.18.1.	arachidonate..20.4n6.
			X2.hydroxydecanoate	N.formylmethionine
			androstenediol..3alpha..17alpha..monosulfate..3.	X1.palmitoyl.2.linoleoyl.GPE..16.0.18.2.
			X1.stearoyl.2.oleoyl.GPE..18.0.18.1.	docosapentaenoate..n6.DPA..22.5n6.
			phenylacetylglutamine	cystathionine
			xylose	X2.hydroxypalmitate
			androsterone.sulfate	X2.hydroxynervonate.
			X1..1.enyl.palmitoyl..2.linoleoyl.GPE..P.16.0.18.2..	isobutyrylcarnitine..C4.
			X4.guanidinobutanoate	X1.stearoyl.2.oleoyl.GPI..18.0.18.1..
			N.acetylaspartate..NAA.	gamma.CEHC
			X2.oxoarginine.	mannose
			X1..1.enyl.palmitoyl..2.oleoyl.GPE..P.16.0.18.1..	adrenate..22.4n6.
T-tau			lactosyl.N.palmitoyl.sphingosine..d18.1.16.0.	X2.aminobutyrate
			sphingomyelin..d18.1.20.1..d18.2.20.0..	uridine
			retinol..Vitamin.A.	oleate.vaccenate..18.1.
			X1.palmitoyl.2.oleoyl.GPE..16.0.18.1.	erythritol
			X2.methylbutyrylcarnitine..C5.	catechol.sulfate
			N.acetylalanine	X1.myristoyl.2.palmitoyl.GPC..14.0.16.0.
			X1..1.enyl.stearoyl..2.linoleoyl.GPE..P.18.0.18.2..	N..2.furoyl.glycine
				methionine.sulfone
				palmitoleate..16.1n7.
				X2.hydroxybutyrate.2.hydroxyisobutyrate
				X16a.hydroxy.DHEA.3.sulfate
				linoleate..18.2n6.
				mead.acid..20.3n9.
				X1.myristoyl.2.arachidonoyl.GPC..14.0.20.4..
				myristoleoylcarnitine..C14.1..
				X10.heptadecenoate..17.1n7.
				glucuronate
				X1.oleoyl.GPE..18.1.
				X5.dodecenoate..12.1n7.
				X1.linoleoyl.GPE..18.2..
	carotene.diol..2.	X3.ureidopropionate	X3.hydroxy.3.methylglutarate	X1.linoleoylglycerol..18.2.
	cholesterol	carotene.diol..2.	orotate	quinolinate
	lactosyl.N.nervonoyl.sphingosine..d18.1.24.1..	lactosyl.N.palmitoyl.sphingosine..d18.1.16.0.	spermidine	oleoyl.linoleoyl.glycerol..18.1.18.2...1.
	isovalerylcarnitine..C5.	X1.linolenoyl.GPC..18.3..	serotonin	hypoxanthine
	erythritol	X1.oleoylglycerol..18.1.	X3.methylglutarylcarnitine..2.	pyrraline
	gamma.glutamyl.epsilon.lysine	X1.oleoyl.GPC..18.1.	sphingomyelin..d18.1.25.0..d19.0.24.1..d20.1.23.0..d19.1.24.0..	formiminoglutamate
Amyloid beta		N.acetylmethionine		linoleate..18.2n6.
				X1.palmitoylglycerol..16.0.
				X1.stearoyl.2.arachidonoyl.GPC..18.0.20.4.
				hexadecadienoate..16.2n6.
				X1.palmitoyl.2.linoleoyl.GPI..16.0.18.2.
				glycosyl.N..2.hydroxynervonoyl..sphingosine..d18.1.24.1.2OH...
	X2.hydroxydecanoate	caprylate..8.0.	gluconate	cholate
	N.acetylaspartate..NAA.	cystathionine	N.acetylglycine	X2.aminobutyrate
	X5.methyluridine..ribothymidine.	cinnamoylglycine	gamma.glutamylleucine	N.acetylarginine
	dimethyl.sulfone	caprate..10.0.	gamma.glutamylvaline	valine
	threonine	etiocholanolone.glucuronide	leucine	gamma.glutamylleucine
	X2.hydroxyoctanoate	sphingomyelin..d18.0.20.0..d16.0.22.0..	sphingomyelin..d18.1.25.0..d19.0.24.1..d20.1.23.0..d19.1.24.0..	leucine
	imidazole.propionate	carboxyethyl.GABA	X5alpha.androstan.3beta.17beta.diol.disulfate	gamma.glutamyl.epsilon.lysine
Attention			gamma.glutamylisoleucine.	gamma.glutamylphenylalanine
			cystathionine	iminodiacetate..IDA.
			X1.oleoyl.GPC..18.1.	S.methylcysteine
			epiandrosterone.sulfate	X5.oxoproline
			indoleacetate	serine
			piperine
			suberoylcarnitine..C8.DC.
			aconitate..cis.or.trans.
			androsterone.sulfate
	suberoylcarnitine..C8.DC.	eicosenoylcarnitine..C20.1..	oleamide	X3.methyl.2.oxobutyrate
	stearoylcarnitine..C18.	glycosyl.N.behenoyl.sphingadienine..d18.2.22.0..	glutamine	quinate
	X3.hydroxyhexanoate	X5alpha.androstan.3beta.17alpha.diol.disulfate	etiocholanolone.glucuronide	oleamide
	X1.methylhistidine	glycosyl.ceramide..d18.1.20.0..d16.1.22.0..	glucose	X2..O.methylcytidine
	myristoylcarnitine..C14.	glycosyl.N.tricosanoyl.sphingadienine..d18.2.23.0..	X1.palmitoyl.GPA..16.0.	cortisone
	myristoleoylcarnitine..C14.1..	glycosyl.N.stearoyl.sphingosine..d18.1.18.0.	X6.oxopiperidine.2.carboxylate	X3.methyl.2.oxovalerate
	palmitoleoylcarnitine..C16.1..	theobromine	X1.linoleoyl.GPE..18.2..	X4.methyl.2.oxopentanoate
Executive	X3.methyl.2.oxovalerate		lignoceroyl.sphingomyelin..d18.1.24.0.	EDTA
	X4.methyl.2.oxopentanoate
	X2.hydroxybutyrate.2.hydroxyisobutyrate
	laurylcarnitine..C12.
	decanoylcarnitine..C10.
	octanoylcarnitine..C8.
	X3.hydroxy.2.ethylpropionate
	linolenoylcarnitine..C18.3..
	imidazole.lactate
	X4.hydroxyphenylacetate	glycerol	caproate..6.0.	X2.aminobutyrate
	isovalerylcarnitine..C5.	cortisone	carboxyethyl.GABA	urea
	cholesterol	beta.alanine	X2.pyrrolidinone	X1.linoleoyl.2.linolenoyl.GPC..18.2.18.3..
	X1.palmitoyl.2.stearoyl.GPC..16.0.18.0.	cystine
	ximenoylcarnitine..C26.1..	N.acetylneuraminate
	N.acetylserine	kynurenine
		prolylglycine
		X5alpha.androstan.3beta.17beta.diol.monosulfate..2.
		X5..galactosylhydroxy..L.lysine
Langauage		cortisol
		quinolinate
		glycochenodeoxycholate
		mead.acid..20.3n9.
		palmitoleate..16.1n7.
		myristoleate..14.1n5.
		beta.citrylglutamate
		X1.methylnicotinamide
		X1.linoleoyl.GPE..18.2..
		myristate..14.0.
	X3.hydroxyhexanoate	X3.hydroxyhexanoate	sphingomyelin..d18.1.18.1..d18.2.18.0.	X1.linoleoyl.2.linolenoyl.GPC..18.2.18.3..
	X3beta.7alpha.dihydroxy.5.cholestenoate	X3beta.7alpha.dihydroxy.5.cholestenoate	glycosyl.N.behenoyl.sphingadienine..d18.2.22.0..	X2.pyrrolidinone
	X3.hydroxyoctanoate	mannose	argininate.	X1..1.enyl.palmitoyl..2.palmitoleoyl.GPC..P.16.0.16.1..
	phytanate	gamma.CEHC	X1.oleoyl.GPC..18.1.	sphingomyelin..d18.2.24.1..d18.1.24.2..
	spermidine	X2.aminophenol.sulfate	sphingomyelin..d18.1.20.1..d18.2.20.0..	X1..1.enyl.palmitoyl..2.palmitoyl.GPC..P.16.0.16.0..
	X2.hydroxynervonate.	xanthurenate	X1.linolenoyl.GPC..18.3..	X4.acetamidobutanoate
	carotene.diol..2.	adipoylcarnitine..C6.DC.	X2.oxoarginine.	sphingomyelin..d18.1.24.1..d18.2.24.0..
	hypotaurine	N6.acetyllysine	stearoyl.sphingomyelin..d18.1.18.0.	X5.dodecenoate..12.1n7.
	glycocholenate.sulfate.		cysteine.glutathione.disulfide
Momery Delay	X3.hydroxy.2.ethylpropionate		X2.hydroxyglutarate
	p.cresol.sulfate		cysteine.s.sulfate
	X1.linoleoylglycerol..18.2.		X1..1.enyl.palmitoyl..GPC..P.16.0..
	isovalerylcarnitine..C5.		N.delta.acetylornithine
	carotene.diol..1.		tyramine.O.sulfate
	X3.hydroxydecanoate		homoarginine
	gamma.glutamylvaline		phenylacetate
	N.acetylneuraminate
	X3.ureidopropionate
	X3beta.7alpha.dihydroxy.5.cholestenoate	cystine	X2.pyrrolidinone	glycosyl.N.behenoyl.sphingadienine..d18.2.22.0..
	spermidine	X2.aminophenol.sulfate	X4.hydroxy.2.oxoglutaric.acid	xylose
	pipecolate	X4.hydroxyphenylacetate	cysteine.s.sulfate	X2.stearoyl.GPE..18.0..
	N.acetylcarnosine	thymol.sulfate	caproate..6.0.	sphingosine
	oleoyl.ethanolamide	laurate..12.0.	heptanoate..7.0.	galactonate
	X3.hydroxy.2.ethylpropionate	epiandrosterone.sulfate	X1..1.enyl.palmitoyl..2.oleoyl.GPE..P.16.0.18.1..	gamma.glutamylglycine
	glycochenodeoxycholate.glucuronide..1.		tyramine.O.sulfate	X2.aminooctanoate
	alpha.hydroxyisocaproate		ceramide..d16.1.24.1..d18.1.22.1..	hypoxanthine
	gamma.glutamylisoleucine.		phenylpyruvate	X1.linoleoyl.2.linolenoyl.GPC..18.2.18.3..
Memory Immediate	hypotaurine		cysteinylglycine	lactate
	X.N.1....N.8...acetylspermidine		alpha.hydroxyisocaproate
	isovalerylcarnitine..C5.		pyruvate
	alpha.hydroxyisovalerate		stearoylcholine.
	orotate
	X2.hydroxy.3.methylvalerate
	guanidinoacetate
	gamma.glutamylmethionine
	X1.palmitoyl.GPA..16.0.
	caprylate..8.0.
	lactosyl.N.palmitoyl.sphingosine..d18.1.16.0.	lactosyl.N.palmitoyl.sphingosine..d18.1.16.0.	threonate	ceramide..d18.1.14.0..d16.1.16.0..
	X1.linoleoyl.GPE..18.2..	N.acetylglycine	palmitoyl.sphingomyelin..d18.1.16.0.	inosine
	N.palmitoyl.sphingadienine..d18.2.16.0..	X1.linoleoyl.GPE..18.2..	glycosyl.N.palmitoyl.sphingosine..d18.1.16.0.	sphingomyelin..d18.1.14.0..d16.1.16.0..
	phenylalanine	arachidoylcarnitine..C20..	N.palmitoyl.sphingosine..d18.1.16.0.	lactate
	lactosyl.N.nervonoyl.sphingosine..d18.1.24.1..	X1.arachidonoyl.GPA..20.4.	cholesterol
	phytanate	X1.palmitoyl.2.stearoyl.GPC..16.0.18.0.	X3.ureidopropionate
	caprylate..8.0.	N.palmitoyl.sphingosine..d18.1.16.0.	fumarate
	cysteine	X1.arachidonoyl.GPE..20.4n6..	glucuronate
Visuoconstruction	methionine	X2.hydroxypalmitate	X4.allylphenol.sulfate
	ceramide..d16.1.24.1..d18.1.22.1..	glycosyl.N.stearoyl.sphingosine..d18.1.18.0.	N.palmitoyl.sphinganine..d18.0.16.0.
		gamma.glutamyl.2.aminobutyrate	sphingomyelin..d18.2.16.0..d18.1.16.1..
		sphingomyelin..d17.1.16.0..d18.1.15.0..d16.1.17.0..
		glycosyl.N.palmitoyl.sphingosine..d18.1.16.0.
		X1.oleoyl.GPE..18.1.
		X1.palmitoyl.GPE..16.0.
		palmitoylcarnitine..C16.
		stearoylcarnitine..C18.
	methyl.4.hydroxybenzoate.sulfate	X3.hydroxyisobutyrate	X2.hydroxyglutarate	O.sulfo.L.tyrosine
	cholate	pipecolate	X1.oleoylglycerol..18.1.	gamma.glutamyl.epsilon.lysine
	stearoyl.sphingomyelin..d18.1.18.0.	indolepropionate	carotene.diol..1.	retinol..Vitamin.A.
	N2.N5.diacetylornithine	X1.stearoyl.2.linoleoyl.GPI..18.0.18.2.	acetylcarnitine..C2.	X1.palmitoleoyl.2.linolenoyl.GPC..16.1.18.3..
Hippocampal volume left	hexanoylglutamine	arabonate.xylonate	carotene.diol..3.
	X1.linoleoyl.GPA..18.2..	X1.5.anhydroglucitol..1.5.AG.	caproate..6.0.
	sphingomyelin..d18.1.20.1..d18.2.20.0..	xanthurenate	glycerate
	X1..1.enyl.palmitoyl..2.arachidonoyl.GPC..P.16.0.20.4..	X1.oleoyl.GPC..18.1.	X4.allylphenol.sulfate
		X1.linoleoyl.GPC..18.2.
		X1.palmitoyl.2.linoleoyl.GPI..16.0.18.2.
	X1.stearoyl.2.linoleoyl.GPI..18.0.18.2.	indolepropionate	X2.hydroxyglutarate	O.sulfo.L.tyrosine
	guanidinoacetate	X1.oleoyl.GPC..18.1.	X4.allylphenol.sulfate	vanillylmandelate..VMA.
	methyl.4.hydroxybenzoate.sulfate	glycosyl.ceramide..d18.2.24.1..d18.1.24.2..	X1.oleoylglycerol..18.1.	gamma.glutamyl.epsilon.lysine
	cholate	glycosyl.N.palmitoyl.sphingosine..d18.1.16.0.		pipecolate
	X1.linoleoyl.GPA..18.2..	X1.linoleoyl.GPC..18.2.		carboxyethyl.GABA
Hippocampal volume right	cysteinylglycine	X3..3.hydroxyphenyl.propionate
		glycosyl.N.stearoyl.sphingosine..d18.1.18.0.
		xanthurenate
		X1.linolenoyl.GPC..18.3..
		pipecolate
		X1.linoleoyl.GPE..18.2..
		mannitol.sorbitol
	methyl.4.hydroxybenzoate.sulfate	indolepropionate	X2.hydroxyglutarate	O.sulfo.L.tyrosine
	cholate	X1.oleoyl.GPC..18.1.	X1.oleoylglycerol..18.1.	gamma.glutamyl.epsilon.lysine
	X1.linoleoyl.GPA..18.2..	pipecolate	caproate..6.0.	vanillylmandelate..VMA.
	N2.N5.diacetylornithine	X1.linoleoyl.GPC..18.2.	X4.allylphenol.sulfate	carboxyethyl.GABA
Hippocampal volume sum	X1.palmitoyl.2.linoleoyl.GPI..16.0.18.2.	xanthurenate	carotene.diol..3.	retinol..Vitamin.A.
	cysteinylglycine	glycosyl.ceramide..d18.2.24.1..d18.1.24.2..	acetylcarnitine..C2.
	X1..1.enyl.palmitoyl..2.arachidonoyl.GPC..P.16.0.20.4..	glycosyl.N.stearoyl.sphingosine..d18.1.18.0.	carotene.diol..1.
		X1.5.anhydroglucitol..1.5.AG.
		X1.palmitoyl.2.linoleoyl.GPI..16.0.18.2.
		X1.linoleoyl.GPE..18.2..
	X1..1.enyl.palmitoyl..2.oleoyl.GPC..P.16.0.18.1..	X1..1.enyl.palmitoyl..2.palmitoleoyl.GPC..P.16.0.16.1..	pyroglutamine.	dihomo.linoleoylcarnitine..C20.2..
	heptanoate..7.0.	X1..1.enyl.palmitoyl..2.palmitoyl.GPC..P.16.0.16.0..	imidazole.lactate	succinate
	sphingomyelin..d18.1.24.1..d18.2.24.0..	X1.2.dipalmitoyl.GPC..16.0.16.0.	S.methylcysteine.sulfoxide	X1.stearoyl.2.docosahexaenoyl.GPC..18.0.22.6.
	ximenoylcarnitine..C26.1..	X2.hydroxybutyrate.2.hydroxyisobutyrate	S.methylcysteine
Cortical thickness in whole brain	sphingomyelin..d18.2.16.0..d18.1.16.1..	X3.ureidopropionate	theobromine
	X3.methylglutarylcarnitine..2.	gamma.glutamyltryptophan
	cerotoylcarnitine..C26..	N.acetylputrescine
	glycocholate	myristoyl.dihydrosphingomyelin..d18.0.14.0..
	palmitoyl.dihydrosphingomyelin..d18.0.16.0..
	sphingomyelin..d18.1.24.1..d18.2.24.0..	X1..1.enyl.palmitoyl..2.palmitoleoyl.GPC..P.16.0.16.1..	pyroglutamine.	X10.undecenoate..11.1n1.
	methionine.sulfone	X1..1.enyl.palmitoyl..2.oleoyl.GPC..P.16.0.18.1..	theobromine	X2.keto.3.deoxy.gluconate
	X1.oleoyl.GPE..18.1.	X1..1.enyl.palmitoyl..2.palmitoyl.GPC..P.16.0.16.0..	X3.methylxanthine	carboxyethyl.GABA
	X1.oleoyl.GPC..18.1.	homocitrulline	X1.palmitoyl.2.docosahexaenoyl.GPC..16.0.22.6.	X3.methylglutaconate
	ximenoylcarnitine..C26.1..	X1.2.dipalmitoyl.GPC..16.0.16.0.		theobromine
	betaine	glycosyl.N.behenoyl.sphingadienine..d18.2.22.0..
	X3.methylglutarylcarnitine..2.	glycosyl.ceramide..d18.2.24.1..d18.1.24.2..
	sphingomyelin..d18.2.24.1..d18.1.24.2..	gamma.glutamyltryptophan
	isovalerylcarnitine..C5.	glycosyl.N.tricosanoyl.sphingadienine..d18.2.23.0..
Cortical thickness in AD regions	glycochenodeoxycholate	X3.ureidopropionate
	N.acetyltyrosine	trans.urocanate
	glycocholate	sphingomyelin..d18.2.23.1..
	X1..1.enyl.stearoyl..2.oleoyl.GPE..P.18.0.18.1.	X3beta.hydroxy.5.cholestenoate
	gluconate	glycosyl.ceramide..d18.1.20.0..d16.1.22.0..
	X12.HETE
	alpha.hydroxyisovalerate
	cholate
	sphingomyelin..d18.2.16.0..d18.1.16.1..
	X1.stearoyl.2.oleoyl.GPI..18.0.18.1..
	palmitoyl.dihydrosphingomyelin..d18.0.16.0..
	stearidonate..18.4n3.
